# Supplementary material for: Iminosugars counteract the downregulation of the interferon γ receptor by dengue virus
Source: PubMed Central journal article supplement (PMC6891261; doi:10.1016/j.antiviral.2019.104551), 2019-10
Supplement: mmc3.pdf [file mmc3.pdf]

**Supplemental Tables 2 and 3: Significance of changes in total (Table 2) and surface (Table 3) receptor expression following 3 days with or without IL-4-treatment, followed by infection with DENV at a MOI 1, then 2 days incubation with or without 100µM NB-DNJ or 25µM MON-DNJ.** Receptor expression was assessed by flow cytometry on permeabilised cells (Table 2) and non-permeabilised cells (Table 3) with primary antibodies as listed, followed by a PE-labelled secondary antibody and quantified by gMFI, which was normalised to isotype control staining. Data from flow cytometry experiments were analysed via three-way ANOVA using SigmaPlot® 13 (Systat Software Inc.) and were considered statistically significant if  $p < 0.05$ . Briefly, IL-4 treatment, DENV infection and iminosugar treatment were used to detect significant differences between each category. Post-hoc pairwise multiple comparisons were performed using the Holm-Šidák method. Arrows indicate whether expression was up- or down-regulated.

**Table 2: Significance of changes in total receptor expression**

|                            | Antibody specificity | p value (direction of regulation) |            |           |           |
|----------------------------|----------------------|-----------------------------------|------------|-----------|-----------|
|                            |                      | IL-4                              | DENV       | NB-DNJ    | MON-DNJ   |
| Attachment/entry receptors | DC-SIGN (CD209)      | 0.384                             | 0.862      | 0.898     | 0.836     |
|                            | MR (CD206)           | <0.001 (↑)                        | 0.003 (↓)  | 0.924     | 0.606     |
|                            | TIM4                 | 0.727                             | 0.825      | 0.718     | 0.694     |
|                            | FcγRIIA (CD32a)      | 0.430                             | 0.051      | 0.788     | 0.374     |
|                            | FcγRIA (CD64)        | 0.300                             | 0.529      | 0.627     | 0.817     |
|                            | CD14                 | 0.007 (↓)                         | 0.291      | 0.989     | 0.758     |
|                            | CD11b                | 0.424                             | 0.347      | 0.475     | 0.090     |
| Immune receptors           | CLEC5A (MDL-1)       | 0.177                             | 0.793      | 0.549     | 0.915     |
|                            | CCR5                 | 0.094                             | 0.982      | 0.607     | 0.655     |
|                            | IFNγR (CD119)        | 0.538                             | <0.001 (↓) | 0.110     | 0.050 (↑) |
|                            | TNFαR (CD120a)       | 0.057                             | <0.001 (↓) | 0.013 (↑) | 0.002 (↑) |

**Table 3: Significance of changes in surface receptor expression.**

|                            | Antibody specificity | p value (direction of regulation) |            |        |         |
|----------------------------|----------------------|-----------------------------------|------------|--------|---------|
|                            |                      | IL-4                              | DENV       | NB-DNJ | MON-DNJ |
| Attachment/entry receptors | DC-SIGN (CD209)      | 0.433                             | 0.763      | 0.742  | 0.742   |
|                            | MR (CD206)           | 0.023 (↑)                         | 0.941      | 0.891  | 0.820   |
|                            | TIM4                 | 0.943                             | 0.408      | 0.640  | 0.970   |
|                            | FcγRIIA (CD32a)      | 0.558                             | 0.867      | 0.882  | 0.955   |
|                            | FcγRIA (CD64)        | 0.053                             | 0.412      | 0.783  | 0.537   |
|                            | CD14                 | 0.002 (↓)                         | 0.085      | 0.643  | 0.468   |
|                            | CD11b                | 0.003 (↑)                         | 0.051      | 0.256  | 0.064   |
| Immune receptors           | CLEC5A (MDL-1)       | <0.001 (↑)                        | 0.794      | 0.794  | 0.944   |
|                            | CCR5                 | 0.601                             | 0.948      | 0.477  | 0.599   |
|                            | IFNγR (CD119)        | 0.769                             | <0.001 (↓) | 0.928  | 0.803   |
|                            | TNFαR (CD120a)       | 0.106                             | 0.046 (↓)  | 0.179  | 0.447   |
